# Supplementary material for: Visual and quantitative detection of copper ions using magnetic silica nanoparticles clicked on multiwalled carbon nanotubes
Source: Royal Society of Chemistry journal article supplement (doi:10.1039/c0cc01593h), 2010-01-01
Supplement: c0cc01593h.pdf [file c0cc01593h.pdf]

## Supporting Information

### Materials

Multiwalled carbon nanotubes (MWNTs,  $\phi = 10\text{-}30$  nm) were purchased from Nanotech Port Co. Ltd. (Shenzhen, China). Tetraethylorthosilicate (TEOS,  $>98$  %), Triton X-100 and 1,3-dicyclohexylcarbodiimide (DCC) were purchased from Sigma-Aldrich. Propargylamine hydrochloride and (3-chloropropyl)trimethoxysilane (CTMS,  $>95$  %) were obtained from Alfa (Ward Hill, MA). Tetramethylbenzidine (TMB), sodium azide ( $\text{NaN}_3$ ) and sodium ascorbate were purchased from BBI (Ontario, Canada). Glutathione (GSH) was obtained from Genview Corp (Houston, TX).  $\text{CuSO}_4 \cdot 5\text{H}_2\text{O}$ ,  $\text{H}_2\text{O}_2$ , cyclohexane, *n*-hexanol,  $\text{FeCl}_3 \cdot 6\text{H}_2\text{O}$ ,  $\text{FeCl}_2 \cdot 4\text{H}_2\text{O}$ ,  $\text{NH}_4\text{OH}$  (25%) and triethylamine were obtained from Beijing Chemicals Inc (Beijing, China). All other reagents were of analytical reagent grade. Aqueous solutions were prepared using distilled water pre-treated with nitrogen gas.<sup>[1]</sup>

### Preparation of acetylene-functionalization of MWNTs (MWNT-al).

The carboxyl-modified MWNTs were prepared by sonicating the primitive MWNTs in a 3:1 v/v solution of concentrated sulfuric acid (98%) and concentrated nitric acid (70%) for 6 h (MWNT-6h) or 24 h (MWNT-24h) at 35–40 °C and washed with copious water, then dried in vacuum at 40 °C for 24 h.<sup>[2-3]</sup>

For preparation of MWNT-al, 25 mg MWNT-COOH (MWNT-6h) were dispersed in 10 mL DMF solutions containing 20 mg DCC, and 0.1 mL triethylamine.<sup>[4]</sup> This mixture solution was sonicated for 1 h, followed by addition of 15 mg propargylamine hydrochloride. After stirring at room temperature for 72 h, 20 mL chloroform was added. The products were obtained by centrifugation, followed by a wash three times with 20 mL chloroform and two times with 10 mL water.

### Preparation of magnetic silica nanoparticles (MSNs).

The  $\text{Fe}_3\text{O}_4$  nanoparticles were prepared as previously reported and in size 5 nm in diameter.<sup>[5]</sup> Magnetic silica nanoparticles were synthesized by the reverse microemulsion method. Briefly, the nanoparticles were synthesized by adding 8.85 g of Triton X-100, 37.5 mL of cyclohexane, and 8 mL of *n*-hexanol to a 100 mL glass vial with continuous magnetic stirring. Next, 2 mL of ddH<sub>2</sub>O and 25 mg  $\text{Fe}_3\text{O}_4$  nanoparticles were added. Followed by the addition of 600  $\mu\text{L}$  of TEOS, the materials were stirred

for 40 min. To initiate silica polymerization, 400  $\mu\text{L}$  of  $\text{NH}_4\text{OH}$  was added. This polymerization was allowed to proceed for 18 h. The particles were obtained by magnetic separation, followed by a wash three times with 20 mL ethanol and two times with water.

#### **Preparation of 3-chloropropyl-functionalized magnetic silica nanoparticles (MSN-Cl).**

Magnetic silica nanoparticles (100 mg) were dried at  $110^\circ\text{C}$  under vacuum conditions for 90 minutes. Afterwards, the amount of 15 mL dry toluene was added under nitrogen atmosphere. After addition of 3-chloropropyltrimethoxysilane (200  $\mu\text{l}$ ), the reaction mixture was allowed to stir for overnight under reflux conditions.<sup>[6]</sup> The functionalized MSN-Cl was separated by centrifugation and washed with each 30 mL of toluene, methanol and water before being dried at  $60^\circ\text{C}$  for 12 hours.

#### **Preparation of azide-functionalized magnetic silica nanoparticles (MSN-N<sub>3</sub>).**

The amount of 50 mg MSN-Cl was added to 10 mL of a saturated solution of sodium azide in DMF.<sup>[6]</sup> The resulting mixture was stirred at  $90^\circ\text{C}$  for overnight. The material was obtained by magnetic separation followed by two times with 30 mL of water and ethanol before being dried at  $60^\circ\text{C}$  for 12 hours.

#### **Preparation of magnetic silica nanoparticles decorated multiwalled-carbon nanotubes (MWNT-MSN).**

To a solution containing 100  $\mu\text{g}\cdot\text{ml}^{-1}$  of MWNT-al and 100  $\mu\text{g}\cdot\text{ml}^{-1}$  of MSN-N<sub>3</sub> in ddH<sub>2</sub>O, a freshly prepared aqueous solution of  $\text{CuSO}_4\cdot 5\text{H}_2\text{O}$  and ascorbic sodium was added.<sup>[6,7]</sup> The final concentration of  $\text{Cu}^{2+}$  was keeping at 0.5 mM, while ascorbic sodium was added at five times the concentration of  $\text{Cu}^{2+}$ . The resulting mixture was allowed to keep at room temperature for 24 h. The magnetic silica nanoparticles decorated multiwalled-carbon nanotubes were recovered by magnetic separation and washed three times with water.

TEM was performed using a JEOL 1011 transmission electron microscope at an accelerating voltage of 100 kV. SEM and EDX were carried out using a HITACHI S-4500 instrument. FTIR characterization was carried out on a BRUKE Vertex 70 FTIR spectrometer.

**Assay:** Kinetic measurements were carried out in time course mode by monitoring the absorbance change at 652 nm<sup>[8, 9]</sup> on a Jasco-V550 UV-Vis spectrophotometer. Experiments were carried out at room temperature using 50  $\mu\text{g}\cdot\text{ml}^{-1}$  MWNT-al, 50  $\mu\text{g}\cdot\text{ml}^{-1}$  MSN-N<sub>3</sub> or MWNT-MSN (prepared from 50  $\mu\text{g}\cdot\text{ml}^{-1}$  MWNT-al and 50  $\mu\text{g}\cdot\text{ml}^{-1}$  MSN-N<sub>3</sub>) in a reaction volume of 500  $\mu\text{L}$  buffer solution (25 mM Na<sub>2</sub>HPO<sub>4</sub>, pH 4.0) with 800  $\mu\text{M}$  TMB as substrate, and H<sub>2</sub>O<sub>2</sub> concentration was 5 mM, unless otherwise stated.

For sensing of Cu(II), different concentration of CuSO<sub>4</sub>·5H<sub>2</sub>O was added to a solution containing 50  $\mu\text{g}\cdot\text{ml}^{-1}$  of MWNT-al and 50  $\mu\text{g}\cdot\text{ml}^{-1}$  of MSN-N<sub>3</sub> in ddH<sub>2</sub>O. Sodium ascorbate at five times the concentration of Cu<sup>2+</sup> was also added.<sup>[7]</sup> After keeping at room temperature for 24 h, the composite was collected by using an external magnetic field and then washed three times with water. With addition of 5 mM H<sub>2</sub>O<sub>2</sub> and 800  $\mu\text{M}$  TMB, kinetic studies were performed to quantitatively evaluate the catalytic ability of the composite. In control experiments, 0.5 mM Al<sup>3+</sup>, Cr<sup>2+</sup>, Ni<sup>2+</sup>, Ba<sup>2+</sup>, Ca<sup>2+</sup>, Co<sup>2+</sup>, Mn<sup>2+</sup>, Zn<sup>2+</sup>, K<sup>+</sup>, Na<sup>+</sup>, Ag<sup>+</sup> were used instead of Cu<sup>2+</sup> for the experiment.

For sensing of Cu(I), a solution of Cu(I)-GSH (premixed from 2 mM Cu<sup>2+</sup> and 20 mM glutathione) was added to the solution containing 50  $\mu\text{g}\cdot\text{ml}^{-1}$  of MWNT-al and 50  $\mu\text{g}\cdot\text{ml}^{-1}$  of MSN-N<sub>3</sub> in water.<sup>[1]</sup> After keeping at room temperature for 24 h, the composite was collected by using an external magnetic field and then washed three times with H<sub>2</sub>O. With addition of 5 mM H<sub>2</sub>O<sub>2</sub> and 800  $\mu\text{M}$  TMB, kinetic studies were performed to quantitatively evaluate the catalytic ability of the composite.

## Reference

- [1] R. F. H. Viguier, A. N. Hulme, *J. Am. Chem. Soc.* **2006**, *128*, 11370.
- [2] X. Li, Y. H. Peng, X. G. Qu, *Nucleic Acids Res.* **2006**, *34*, 3670.
- [3] X. Li, Y. H. Peng, J. S. Ren, X. G. Qu, *Proc. Natl. Acad. Sci. U.S.A.* **2006**, *103*, 19658
- [4] J. X. Yu, S. Mathew, B. S. Flavel, M. R. Johnston, J. G. Shapter, *J. Am. Chem. Soc.* **2008**, *130*, 8788.
- [5] Y. J. Song, C. Zhao, J. S. Ren, X. G. Qu, *Chem. Comm.* **2009**, 1975.
- [6] A. Schlossbauer, D. Schaffert, J. Kecht, E. Wagner, T. Bein, *J. Am. Chem. Soc.* **2008**, *130*, 12558.
- [7] Y. Zhou, S. X. Wang, K. Zhang, X. Y. Jiang, *Angew. Chem. Int. Ed.* **2008**, *47*, 7454.
- [8] Y. J. Song, X. H. Wang, C. Zhao, K. G. Qu, J. S. Ren, X. G. Qu, *Chem. Eur. J.* **2010**, *16*, 3617.
- [9] Y. J. Song, K. G. Qu, C. Zhao, J. S. Ren, X. G. Qu, *Adv. Mater.* **2010**, *22*, 2206.

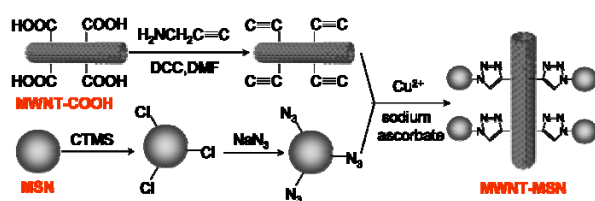

*Scheme S1.* Synthetic Scheme of magnetic silica nanoparticles clicked on multiwalled-carbon nanotubes.

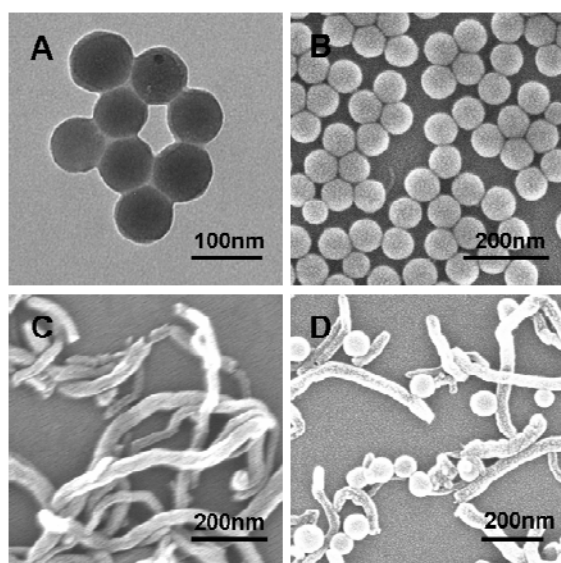

*Figure S1.* TEM image of A) MSN-N<sub>3</sub>; SEM images of B) MSN-N<sub>3</sub>, C) MWNT-al and D) MWNT-MSN.

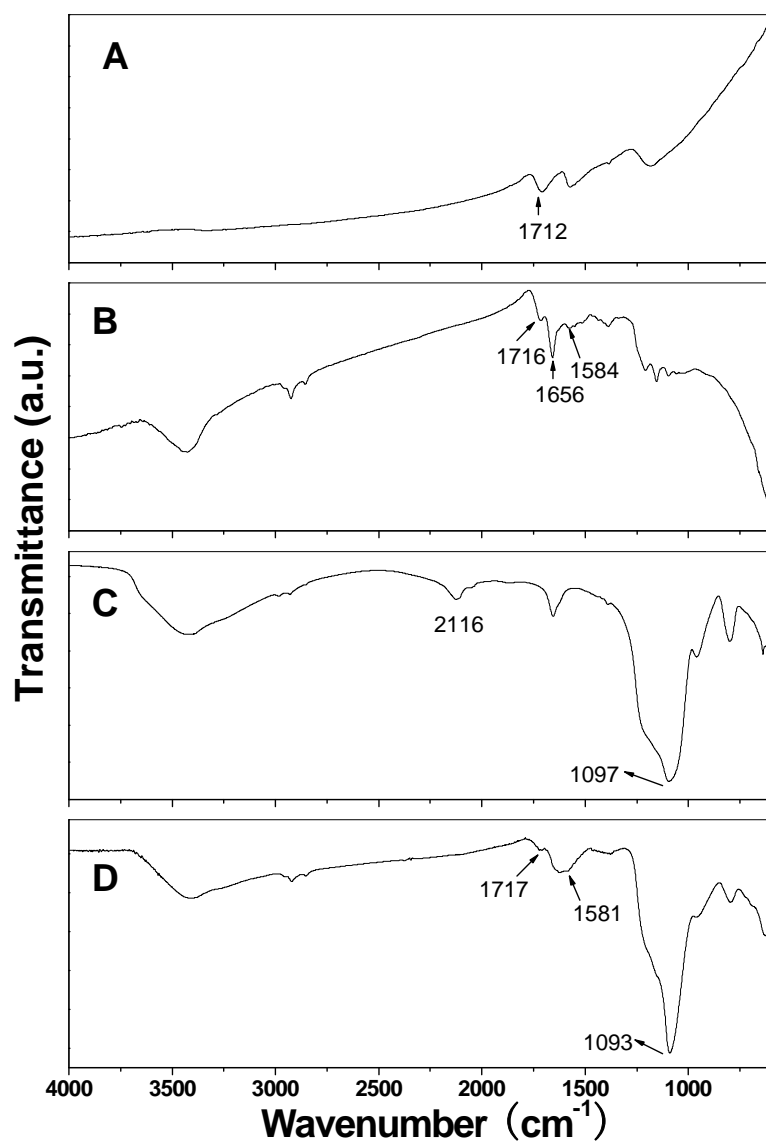

**Figure S2.** FTIR spectra of (A)MWNT-COOH, (B) MWNT-al, (C) MSN-N<sub>3</sub> and D) MWNT-MSN.

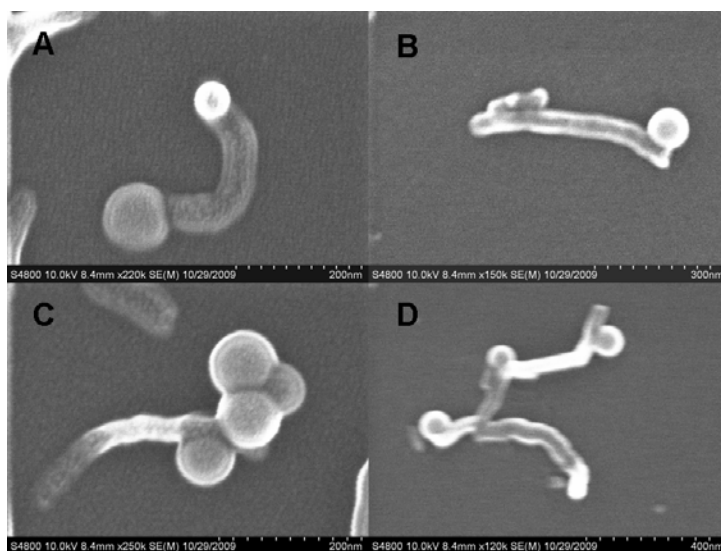

**Figure S3.** Different morphologies of MWNT-MSN: A) MSNs at the ends of MWNT; B) MSN at the sidewalls of MWNT; C) MSNs aggregates on MWNTs; (D) End-to-end array of MWNTs linked by MSNs.

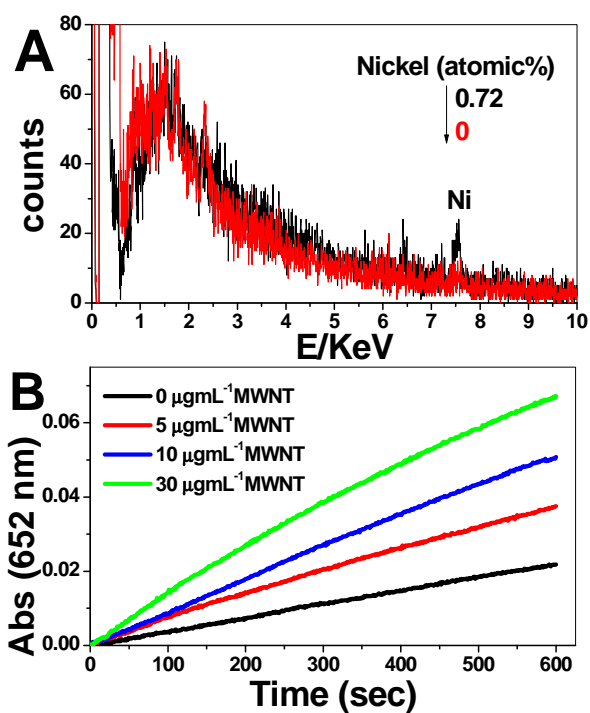

**Figure S4.** (A) EDX spectra of pristine MWNTs (black) and MWNT-24h (red). (B) The time-dependent absorbance changes at 652 nm in the absence (black) or presence of MWNT-24h: 5 (red), 10 (blue), and 30  $\mu\text{g}\cdot\text{mL}^{-1}$  (green) in phosphate buffer (25 mM  $\text{Na}_2\text{HPO}_4$ , pH 5.0) at room temperature. 800  $\mu\text{M}$  TMB and 50 mM  $\text{H}_2\text{O}_2$  were added to 500  $\mu\text{L}$  buffer solution to perform the experiment.

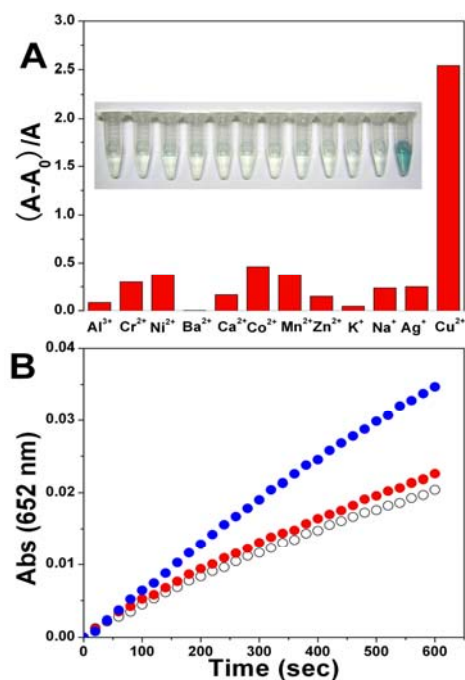

**Figure S5.** A) Selectivity analysis for Cu<sup>2+</sup> detection by monitoring the relative absorbance. Ion concentration of Al<sup>3+</sup>, Cr<sup>2+</sup>, Ni<sup>2+</sup>, Ba<sup>2+</sup>, Ca<sup>2+</sup>, Co<sup>2+</sup>, Mn<sup>2+</sup>, Zn<sup>2+</sup>, K<sup>+</sup>, Na<sup>+</sup> and Ag<sup>+</sup> is 0.5 mM. [Cu<sup>2+</sup>] = 200 μM. Sodium ascorbate at five times the concentration of ions was also added. Inset: Typical photographs for Cu<sup>2+</sup> detection with the colorimetric method developed using click chemistry and peroxidase-like catalytic reaction. (from left to right: 0.5 mM Al<sup>3+</sup>, Cr<sup>2+</sup>, Ni<sup>2+</sup>, Ba<sup>2+</sup>, Ca<sup>2+</sup>, Co<sup>2+</sup>, Mn<sup>2+</sup>, Zn<sup>2+</sup>, K<sup>+</sup>, Na<sup>+</sup>, Ag<sup>+</sup> and 200 μM Cu<sup>2+</sup>, sodium ascorbate at five times the concentration of ions was also added). B) The time-dependent absorbance changes at 652 nm in the absence (black) or presence of 10 μM (red) and 50 μM (blue) Cu (I)-GSH complex (prepared from 2 mM Cu<sup>2+</sup> and 20 mM glutathione).
